# Supplementary material for: Genomic Analysis of Carbapenem-Resistant Acinetobacter baumannii Isolates Belonging to Major Endemic Clones in South America
Source: PubMed Central journal article supplement (PMC7734285; doi:10.3389/fmicb.2020.584603), 2020-11-30
Supplement: Table_2.pdf [file Table_2.pdf]

**Supplementary Table S2.** Whole-genome sequencing and assembly statistics of *A. baumannii* clinical isolates included in the study.

| <b>Isolate ID</b> | <b>Avg. Coverage</b> | <b>Read Count</b> | <b>Avg. Read Length (bp)</b> | <b>Assembly Base Count</b> | <b>Contig Count</b> | <b>N50 (bp)</b> | <b>Avg. Contig Length (bp)</b> | <b>Max. Contig Length (bp)</b> | <b>Min. Contig Length (bp)</b> |
|-------------------|----------------------|-------------------|------------------------------|----------------------------|---------------------|-----------------|--------------------------------|--------------------------------|--------------------------------|
| 52944             | 70                   | 1463594           | 187                          | 3891392                    | 530                 | 14092           | 7342                           | 70468                          | 177                            |
| 61317             | 95                   | 1691750           | 219                          | 4051914                    | 380                 | 25362           | 10662                          | 80799                          | 205                            |
| 61979             | 94                   | 1845066           | 198                          | 3868427                    | 461                 | 19131           | 8391                           | 70400                          | 192                            |
| 63231             | 75                   | 1724710           | 170                          | 3815419                    | 535                 | 14782           | 7131                           | 61611                          | 161                            |
| 63485             | 97                   | 1917776           | 196                          | 3851357                    | 498                 | 17254           | 7733                           | 49801                          | 185                            |
| 66116             | 78                   | 1500004           | 203                          | 3987347                    | 251                 | 40792           | 15885                          | 134420                         | 193                            |
| 67098             | 99                   | 2007834           | 193                          | 3972821                    | 240                 | 39022           | 16553                          | 156766                         | 181                            |
| 67510             | 109                  | 2194376           | 194                          | 4028273                    | 457                 | 20511           | 8814                           | 81834                          | 192                            |
| 67745             | 105                  | 1940996           | 211                          | 3909264                    | 560                 | 15794           | 6980                           | 63303                          | 201                            |
| 20189365          | 99                   | 1845870           | 210                          | 3894930                    | 534                 | 16364           | 7293                           | 78534                          | 201                            |
| 20216722          | 118                  | 2337936           | 197                          | 3916738                    | 446                 | 19712           | 8781                           | 88433                          | 185                            |
| 182122            | 103                  | 1887198           | 213                          | 3795841                    | 281                 | 27542           | 13508                          | 70036                          | 201                            |
| 71838             | 119                  | 2417018           | 191                          | 3719202                    | 486                 | 14260           | 7652                           | 57637                          | 181                            |
| 206182            | 117                  | 2221686           | 204                          | 3996890                    | 423                 | 20656           | 9448                           | 73002                          | 193                            |
| 71813             | 93                   | 2084788           | 173                          | 3748797                    | 390                 | 19198           | 9612                           | 65033                          | 161                            |
| 278860            | 89                   | 1591158           | 217                          | 3868684                    | 421                 | 18972           | 9189                           | 72810                          | 205                            |
| 300736            | 104                  | 1903622           | 212                          | 3969551                    | 421                 | 22412           | 9428                           | 72848                          | 201                            |
| 10042             | 69                   | 1496268           | 180                          | 3863634                    | 391                 | 22219           | 9881                           | 81949                          | 169                            |

Raw sequence and assembly data retrieved from SeqSphere v.7.0.4 software, before and after *de novo* genome assembly using Velvet.
